# Supplementary material for: The role of postmastectomy radiotherapy in clinically node-positive, stage II-III breast cancer patients with pathological negative nodes after neoadjuvant chemotherapy: an analysis from the NCDB
Source: PubMed Central journal article supplement (PMC5029747; doi:10.18632/oncotarget.6664), 2015-12-18
Supplement: oncotarget-07-24848-s001.pdf [file oncotarget-07-24848-s001.pdf]

# The role of postmastectomy radiotherapy in clinically node-positive, stage II-III breast cancer patients with pathological negative nodes after neoadjuvant chemotherapy: an analysis from the NCDB

## Supplementary Material

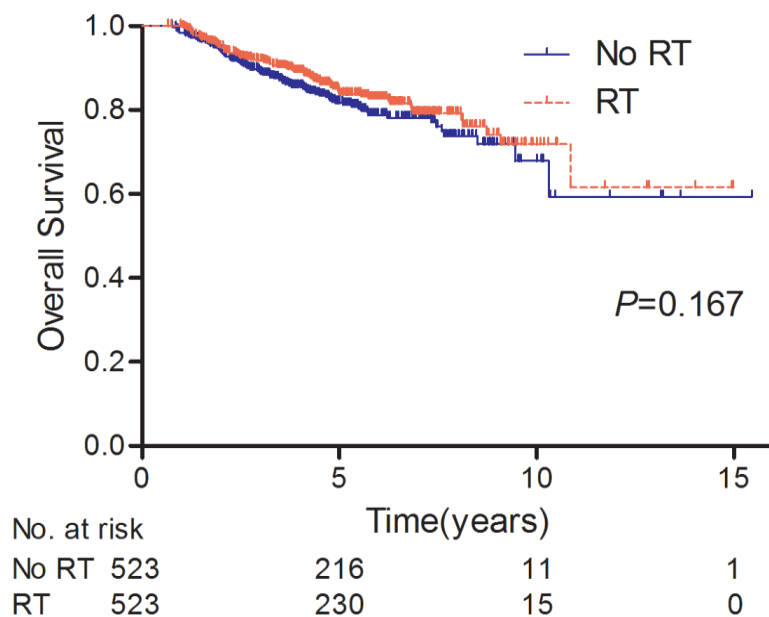

Supplementary Figure 1 Rate of overall survival for the propensity score-matched patients treated with PMRT (n=523) and without PMRT (n=523).

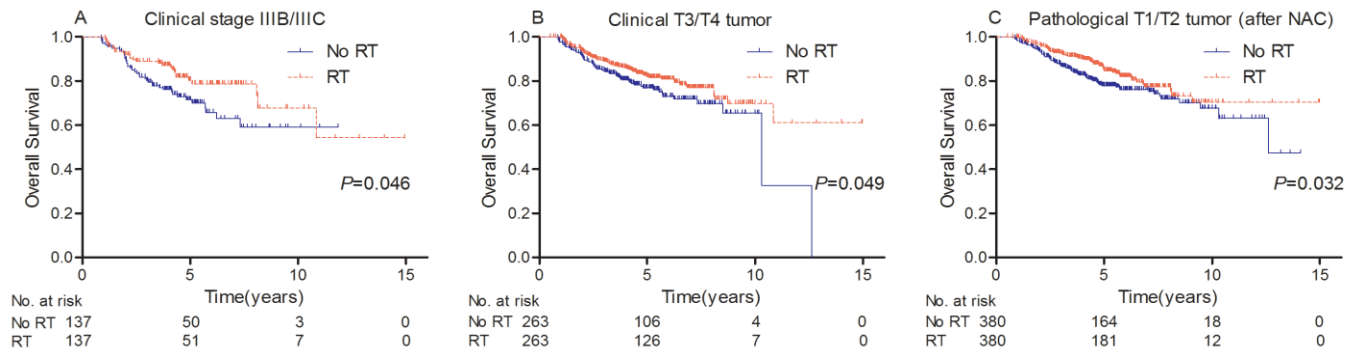

Supplementary Figure 2 Rate of overall survival for the propensity score-matched patients with A) clinical IIIB/IIIC disease, B) clinical T3/T4 tumor, or C) pathologic T1/T2 tumor after NAC who were treated with PMRT and without PMRT.

Supplementary Table 1 Multivariate analysis of PMRT's effect on OS for the propensity score-matched patients (n=1046)

| Factors not included in the propensity score | HR        | 95% CI      | <i>P</i>     |
|----------------------------------------------|-----------|-------------|--------------|
| Hormone therapy                              |           |             |              |
| No                                           | Reference |             |              |
| Yes                                          | 0.594     | 0.423-0.833 | <b>0.003</b> |
| PMRT                                         |           |             |              |
| No                                           | Reference |             |              |
| Yes                                          | 0.847     | 0.632-1.136 | 0.268        |

Abbreviations: PMRT, postmastectomy radiotherapy; OS, overall survival; HR, hazard ratio; CI, confidence interval

Abbreviations: OS, overall survival; HR, hazard ratio; CI, confidence interval; AJCC, American Joint Committee on Cancer (fifth or sixth edition); NAC, neoadjuvant chemotherapy; PMRT, postmastectomy radiotherapy
